# Supplementary material
Source: publisher site journal article supplement (https://www.dovepress.com/article/239095)
Supplement: Supplementary file 1 [file get_supplementary_file.php]

**Appendix**

**Contents**

[Table S1. Retrieval strategy and search results in PubMed 2](#_Toc37002819)

[Table S2. Retrieval strategy and search results in Embase 2](#_Toc37002820)

[Table S3. Retrieval strategy and search results in the Cochrane Library 2](#_Toc37002821)

[Table S4. The list of excluded studies in the process of full text screening 3](#_Toc37002822)

[Table S5. Basic characteristics of all included studies 6](#_Toc37002823)

[Table S6. Risk of bias assessment for randomized controlled trial 12](#_Toc37002824)

[Table S7. Quality assessment for cohort studies 12](#_Toc37002825)

[Table S8. Risk of bias assessment for case series studies 13](#_Toc37002826)

[Table S9. Quality assessment of pharmacokinetic studies using ClinPK Statement 14](#_Toc37002827)

# Table S1. Retrieval strategy and search results in PubMed

|  | Search terms | Number of documents |
| --- | --- | --- |
| 1 | (VANCOMYCIN[MeSH Terms]) OR vancomycin[Text Word] | 30272 |
| 2 | neutropenia[MeSH Terms] OR neutropeni*[Text Word] | 61916 |
| 3 | (Hematologic neoplasms[MeSH Terms]) OR ((hematologic*[Text Word] OR haematologic*[Text Word] OR blood[Text Word]) AND (malignanc*[Text Word] OR neoplasm*[Text Word] OR cancer[Text Word])) | 402572 |
| 4 | #2 OR #3 | 454050 |
| 5 | #1 AND #4 | 1062 |

# Table S2. Retrieval strategy and search results in Embase

|  | Search terms | Number of documents |
| --- | --- | --- |
| 1 | 'hematologic malignancy'/exp OR 'hematologic neoplasms'/exp | 2,413,098 |
| 2 | (hematologic*:ti,ab,kw OR haematologic*:ti,ab,kw OR blood:ti,ab,kw) AND (malignanc*:ti,ab,kw OR neoplasm*:ti,ab,kw OR cancer:ti,ab,kw) | 263,209 |
| 3 | #1 OR #2 | 2,570,549 |
| 4 | 'neutropenia'/exp OR neutropenia:ab,ti,kw OR neutropenic:ab,ti,kw | 128,708 |
| 5 | #3 OR #4 | 2,575,900 |
| 6 | vancomycin:ab,ti,kw | 39,606 |
| 7 | #5 AND #7 | 5,162 |

# Table S3. Retrieval strategy and search results in the Cochrane Library

|  | Search terms | Number of documents |
| --- | --- | --- |
| 1 | MeSH descriptor: [Hematologic Neoplasms] explode all trees | 544 |
| 2 | (hematologic*:ti,ab,kw OR haematologic*:ti,ab,kw OR blood:ti,ab,kw) AND (malignanc*:ti,ab,kw OR neoplasm*:ti,ab,kw OR cancer:ti,ab,kw) (Word variations have been searched) | 33987 |
| 3 | MeSH descriptor: [Neutropenia] explode all trees | 1703 |
| 4 | Neutropeni*:ti,ab,kw (Word variations have been searched) | 13090 |
| 5 | MeSH descriptor: [Vancomycin] explode all trees | 791 |
| 6 | vancomycin:ti,ab,kw (Word variations have been searched) | 1987 |
| 7 | #1 or #2 or #3 or #4 | 43639 |
| 8 | #5 or #6 | 1987 |
| 9 | #7 and #8 | 180 |

# Table S4. The list of excluded studies in the process of full text screening

| **No.** | **Author (year)** | **Title** | **Journal** | **Reason for exclusion** | **Note** |
| --- | --- | --- | --- | --- | --- |
| 1 | Kremery 1997 | Monitoring vancomycin serum concentrations in cancer patients undergoing cytotoxic chemotherapy | Pediatr Infect Dis J | Patients did not meet the inclusion criteria | Cancer patients not specified to hematological malignancy |
| 2 | Haeseker 2016 | Evaluation of Vancomycin Prediction Methods Based on Estimated Creatinine Clearance or Trough Levels | Ther Drug Monit | Patients did not meet the inclusion criteria | Neither hematological malignancy nor neutropenia |
| 3 | Omote 2009 | A retrospective analysis of vancomycin pharmacokinetics in Japanese cancer and non-cancer patients based on routine trough monitoring data | Biol Pharm Bull | Patients did not meet the inclusion criteria | Solid cancer |
| 4 | Bauters 2019 | Augmented Renal Clearance Associated with Vancomycin Clearance in Pediatric Hemato-Oncology and Stem Cell Transplantation Patients | Biology of Blood and Marrow Transplantation | Patients did not meet the inclusion criteria | pediatrics |
| 5 | Soto 1992 | [Initial dosage of vancomycin in neutropenic hematologic patients] | Sangre (Barc) | Already reported | Contents in duplicate with Soto 1993 |
| 6 | Kergueris 1994 | Application of USC*PACK clinical programs to vancomycin in neutropenic patients | Int J Biomed Comput | Already reported | Same data and same objective from Le Normand |
| 7 | Jasic 2006 | Efficacy and safety of linezolid compared with vancomycin in a randomized, double-blind study of febrile neutropenic patients with cancer | Clin Infect Dis | Not relevant to vancomycin dosing regimen |  |
| 8 | Monnier 2014 | Generic vancomycin products: Analysis of serum concentrations in patients with acute myeloid leukemia | Annales pharmaceutiques françaises | Not relevant to vancomycin dosing regimen |  |
| 9 | Vergoulidou 2009 | Comparative evaluation of daptomycin and pharmakocinetically-guided vancomycin therapy in patients with prolonged neutropenia or haematopoietic stem cell transplantation | Clinical Microbiology and Infection | Not relevant to vancomycin dosing regimen |  |
| 10 | Libuit 2014 | Empiric vancomycin use in febrile neutropenic oncology patients | Open Forum Infect Dis | Not relevant to vancomycin dosing regimen |  |
| 11 | Tattevin 2006 | What can we learn from studies comparing linezolid with vancomycin in neutropenic patients when vancomycin dosages are not optimized? | Clin Infect Dis | Not relevant to vancomycin dosing regimen |  |
| 12 | Mae 2013 | Acute kidney injury after myeloablative cord blood transplantation in adults: The efficacy of strict monitoring of vancomycin serum trough concentrations | Transplant Infectious Disease | Not relevant to vancomycin dosing regimen |  |
| 13 | Caroline 2012 | Prospective vancomycine audit in a regional centre of fight against cancer | International Journal of Clinical Pharmacy | Not relevant to vancomycin dosing regimen |  |
| 14 | Hayatshahi 2010 | Drug utilization review of Vancomycin in febrile neutropenic patients hospitalized at a bone marrow transplantation center | International Journal of Hematology-Oncology and Stem Cell Research | Not relevant to vancomycin dosing regimen |  |
| 15 | Junior 2007 | Analysis of vancomycin use and associated risk factors in a university teaching hospital: a prospective cohort study | BMC Infect Dis | Not relevant to vancomycin dosing regimen |  |
| 16 | Fernandez 1994 | Individualizing vancomycin dosing regimens: an evaluation of two pharmacokinetic dosing programs in critically ill patients | Pharmacotherapy | Not relevant to vancomycin dosing regimen |  |
| 17 | Tatsuzawa 2019 | Pharmacokinetic assessment of vancomycin for the management of febrile neutropenia in patients with hematologic malignancy and its difficulty:-Case reports | Japanese Pharmacology and Therapeutics | Ineligible study type | Case reports |
| 18 | Lee 2013 | Individualized dosing of anti-MRSA antibiotics based on PK/PD | International Journal of Antimicrobial Agents | Ineligible study type | review |
| 19 | Lortholary 1997 | Using glycopeptides in febrile neutropenic adults | Medecine et Maladies Infectieuses | Ineligible study type | review |
| 20 | Pea 2000 | Optimisation of vancomycin regimen in neutropenic haematological patients with normal renal function. Multiple daily doses may be preferable | Clinical Drug Investigation | Insufficient clinical data | Full-text was not available and abstract couldn’t provide adequate information |
| 21 | Fernandez 1993 | Vancomycin pharmacokinetics and dosage requirements in hematologic malignancies | Clin Pharm | Insufficient clinical data | Full-text, abstract and the corresponding author were not available |
| 22 | Molas 2012 | Vancomycin dose adjustment in oncologic and haematologic patients | International Journal of Clinical Pharmacy | Insufficient clinical data | Conference abstract provides insufficient information |
| 23 | Toro 2017 | Acute renal injury and vancomycin levels in patients undergoing autologous hematopoietic stem cell transplantation | Biology of Blood and Marrow Transplantation | Insufficient clinical data | Conference abstract provides insufficient information |

# Table S5. Basic characteristics of all included studies

| **Study** | **Country** | **Study design** | **Characteristics of patients included** | **Patients with neutropenia (%)** | **Sample size** | **Age**  **(years)** | **Gender (M/F)** | **Weight (kg)** | **Renal function** | **Grouping** | | **Type of study a** |
| --- | --- | --- | --- | --- | --- | --- | --- | --- | --- | --- | --- | --- |
| **Group A** | **Group B** |
| Hochart 2011 | France | single-center retrospective study (case series) | acute myeloid leukemia patients with febrile neutropenia | 100% | 54 (67 vancomycin treatment courses, VTCs) | 50 ± 13.6 | 27/27 | 73 ± 18.1 | 107.5 ± 35.4 ml/min | NA | NA | 1 |
| O'Donnell 2011  (conference abstract) | UK | single-center retrospective study (case series) | bone marrow transplant patients who experienced an episode of febrile neutropenia | 100% | 12 | NR | NR | NR | NR | NA | NA | 1 |
| Donovan 2012  (conference abstract) | United states | retrospective study (case series) | neutropenic adult patients | 100% | 198 | NR | NR | NR | NR | NA | NA | 1 |
| Vazin 2012 | Iran | prospective study (case series) | Patients in a hematology-oncology ward who received at least 3 successive doses of vancomycin and had serum vancomycin concentrations at steady state | 88% | 58 | 36.58 ± 14.33 | 44/14 | 68.05 ± 12.61 | 57/58（98.2%）b | NA | NA | 1 |
| Ghehi 2013    Taghizadeh-Ghehi 2015 | Iran | single-center prospective study (case series) | Adults receiving vancomycin for neutropenic fever after HSCT | 100% | 46 | 32.9 ± 12.45 | 30/16 | 74.8 ± 16.6 | 102.5 ± 35.33 ml/min | NA | NA | 1, 3, 5 |
| Luo 2014 | Canada | Single-center prospective study (case series) | Leukemia/bone  marrow transplant outpatients (at least two doses of vancomycin) | 21 (42%) | 48 | 54.5 (median) | 24/24 | NR | 77 μmol/L (median)c | NA | NA | 1 |
| Vermis 2014  (conference abstract) | Belgium | single-center retrospective study (case series) | Patients with hematological malignancies | 72 % | 96 (112 VTCs) | NR | NR | NR | NR | NA | NA | 1 |
| Haeseker 2014 | Netherlands | Single-center prospective study | Adults received vancomycin intravenously and had at least two plasma samples | NA | 171 | 59 ± 14 | 104/67 | NR | 109 ± 72 ml/min | Neutropenia (< 500/mm3): n=56 | Non-neutropenia: n=115 | 2, 4, 5 |
| Choi 2017 | Korea | Single-center retrospective study | adults receiving routine TDM of vancomycin | NA | 1307 | Median is 54 and 56 in 2 groups | 728/579 | Median is 62.0 and 60.0 in 2 groups | Median is 53.0 and 61.9 μmol/L | Neutropenia (< 500/mm3) n=162 | Non-neutropenia: n=1145 | 2 |
| Al-Kofide 2009 | Saudi Arabia | Single-center retrospective study | Adults receiving vancomycin therapy | NA | 31 | 46.4 ± 20.8 | NR | 68.0 ± 15.1 | 97.8 ± 50.8 mL/min | cancer patients (proportion of patients with hematological malignanacies was 88.9%): n=18 | patients without cancer: n=13 | 2, 5 |
| Bury 2019 | The Netherlands | Retrospective matched cohort study | intravenous vancomycin therapy for ≥ 2 days and at least one available vancomycin concentration | 26.7% | 116 | 61.4 ± 13.4 | 67/49 | NR | Median 92.7 mL/min | NA | NA | 3, 5 |
| Izumisawa 2019 | Japan | retrospective cohort study | Adults receiving > 3 days of vancomycin therapy | NR | 522 | 66.4 ±15.3 | 321/201 | 55.6 ± 11.7 | 75.6 ± 32.4 | hematologic malignancy patients: n=261 | non-malignancy patients: n=261 | 2 |
| Kureishi 1990 | Canada | Single-center prospective study | patients with acute leukemia and had absolute granulocyte below 500/mm3 | 100% | 25 | NR | NR | NR | NR | NA | NA | 3 |
| Le Normand 1994 | France | Single-center prospective study | patients with hematologic malignancies who were neutropenic (100/mm3) | 100% | 10 | 36.2 (range:18-50) | 4/6 | 64.6±10.4 | 141.2 ± 36.2 ml/min | NA | NA | 3, 4 |
| Jarkowski 2011 | United states | Single-center prospective study | acute myeloid leukemia patients receiving vancomycin | NR | 25 | 59.12±16.26 | 17/8 | 86.05±19.42 | 85.72±37.28 ml/min/1.73m2 | NA | NA | 3 |
| Buelga 2005 | Spain | Single-center retrospective study | Adult inpatients with an underlying hematological malignancy | 43.7% | 215 | 51.5±15.9 | 119/96 | 64.7±11.3 | 89.4±39.2 ml/min | NA | NA | 3 |
| Okada 2018 | Japan | Single-center retrospective study | patients undergoing allo-HSCT who received preventive treatment with vancomycin | NR | 75 | 49 (range: 17–69) | 49/26 | 59.4 (range: 39.4–104.5) | 113 (range: 47–253) ml/min | NA | NA | 3, 5 |
| Hirai 2016 | Japan | Single-center retrospective study (case series) | Adults receiving  intravenous vancomycin | 11.3% | 292 | 72.0 (62.8 – 82.0) d | 185/107 | 52.8 (44.6–60.6) d | 79.5 (57.0–110.4) d mL/min | NA | NA | 4 |
| Soto 1993 | Spain | Case series | Neutropenic (<1000/mm3) hematological patients | 100% | 45 | 43 ± 18 | 21/24 | 63 ± 12 | 84.7 ± 32 mL/min | NA | NA | 4 |
| Fernandez 2009 | Spain | pharmacokinetic/pharmacodynamic analyses using monte carlo simulation | patients with malignant haematological disease | NA | NA | NA | NA | NA | NA | NA | NA | 5 |
| Suzuki 2015 | Japan | Single-center retrospective study (case series) | Hospitalized patients with hematological malignancy treated with vancomycin for febrile neutropenia | 100% | 63 | 50.9 ± 14.2 | 43/20 | 55.6 ± 7.9 | 113.1 ± 40.6 ml/min | NA | NA | 6 |
| Fernandez 1996 | Spain | Randomized controlled trial | Immunocompromised febrile adults with hematologic malignancies and received vancomycin | 100% | 77 | 53.1 ± 16.7 | 50/20 | 63.7 ± 11.6 | 75.7 ± 25.0 μmol/L | A one-compartment pharmacokinetic model was used for pharmacokinetic interpretation of serum vancomycin concentrations | Initial: a published nomagram  Dose adjustment: Non-intervention | 6 |

Abbreviations: NA, not applicable; NR, not reported; HSCT, hematopoietic stem cell transplantation; VTC, vancomycin treatment course

a Type of study: 1. Clinical audit of vancomycin dosing; 2. Comparative pharmacokinetic studies; 3. Development of pharmacokinetic/population pharmacokinetic models; 4. The potential effect of neutropenia on creatinine clearance calculated by Cockroft-Gault formula; 5. Optimization of initial vancomycin dosage regimen; 6. Evaluation and implementation of vancomycin TDM

b, Proportion of patients with normal renal function

c, the median of serum creatinine;

d, median (interquartile range)

# Table S6. Risk of bias assessment for randomized controlled trial

|  | Random sequence generation | Allocation concealment | Blinding of participants and personnel | Blinding of outcome assessment | Incomplete outcome data | Selective reporting | Other bias |
| --- | --- | --- | --- | --- | --- | --- | --- |
| Fernandez 1996 | Low risk | Low risk | High risk | High risk | Low risk | Unclear | Unclear |

# Table S7. Quality assessment for cohort studies

| Study | Selection | | | | Comparability | Outcome | | |  |
| --- | --- | --- | --- | --- | --- | --- | --- | --- | --- |
| Representativeness of the exposed cohort | Selection of the non exposed cohort | Ascertainment of exposure | Demonstration that outcome of interest was not present at start of study a | Comparability of cohorts on the basis of the design or analysis | Assessment of outcome | Was follow-up long enough for outcomes to occur a | Adequacy of follow up of cohorts |  |
| Haeseker 2014 | ☆ | ☆ | ☆ | ☆ | ☆ | ☆ | ☆ | ☆ | 8 |
| Choi 2017 | ☆ | ☆ | ☆ | ☆ | 0 | ☆ | ☆ | ☆ | 7 |
| AI-Kofide 2009 | ☆ | ☆ | ☆ | ☆ | 0 | 0 | ☆ | ☆ | 6 |
| Izumisawa 2019 | ☆ | ☆ | ☆ | ☆ | ☆ | ☆ | ☆ | ☆ | 8 |

a The outcome of these studies is pharmacokinetic parameter, which will not be affected by the item.

# Table S8. Risk of bias assessment for case series studies

| Study | Q1 | Q2 | Q3 | Q4 | Q5 | Q6 | Q7 | Q8 | Q9 | Quality rating |
| --- | --- | --- | --- | --- | --- | --- | --- | --- | --- | --- |
| Hochart 2011 | Yes | Yes | Yes | Yes | Yes | No | Yes | NA | Yes | Fair |
| Vazin 2012 | Yes | Yes | Yes | No | No | Yes | Yes | NA | Yes | Fair |
| Ghehi 2013,  Ghehi 2015 | Yes | Yes | Yes | Yes | Yes | Yes | Yes | Yes | Yes | Good |
| Luo 2014 | Yes | Yes | Yes | No | Yes | Yes | NR | NA | Yes | Fair |
| Hirai 2016 | Yes | Yes | Yes | No | No | Yes | Yes | Yes | Yes | Fair |
| Soto 1993 | Yes | CD | Yes | Yes | Yes | Yes | Yes | Yes | Yes | Good |
| Suzuki 2015 | Yes | Yes | Yes | Yes | No | Yes | Yes | Yes | Yes | Fair |

Abbreviations: CD, cannot determine; NA, not applicable; NR, not reported

Q1. Was the study question or objective clearly stated?

Q2. Was the study population clearly and fully described, including a case definition?

Q3. Were the cases consecutive?

Q4. Were the subjects comparable?

Q5. Was the intervention clearly described?

Q6. Were the outcome measures clearly defined, valid, reliable, and implemented consistently across all study participants?

Q7. Was the length of follow-up adequate?

Q8. Were the statistical methods well-described?

Q9. Were the results well-described?

# Table S9. Quality assessment of pharmacokinetic studies using ClinPK Statement

| **Checklist Item** | **Ghehi 2013** | **Kureishi 1990** | **Le Normand 1994** | **Jarkowski 2011** | **Buelga 2005** | **Okada 2018** | **Bury 2019** |
| --- | --- | --- | --- | --- | --- | --- | --- |
| **Title/Abstract** | | | | | | | |
| 1. The title identifies the drug(s) and patient population(s) studied. | Yes | Yes | Yes | Yes | Yes | Yes | Yes |
| 2. The abstract minimally includes the name of the drug(s) studied, the route of administration, the population in whom it was studied, and the results of the primary objective and major clinical pharmacokinetic findings. | Yes | Partially | Yes | Yes | Yes | Yes | Partially |
| **Background** | | | | | | | |
| 3. Pharmacokinetic data (i.e., absorption, distribution, metabolism, excretion) that is known and relevant to the drugs being studied is described | Yes | No | No | Yes | Yes | Yes | Yes |
| 4. An explanation of the study rationale is provided | Yes | Yes | Yes | Yes | Yes | Yes | Yes |
| 5. Specific objectives or hypotheses is provided | Yes | Yes | Yes | Yes | Yes | Yes | Yes |
| **Methods** | | | | | | | |
| 6. Eligibility criteria of study participants are described | Yes | Yes | Yes | Yes | Yes | Yes | Yes |
| 7. Co-administration (or lack thereof) of study drug(s) with other potentially interacting drugs or food within this study is described. | NA | NA | NA | NA | NA | NA | NA |
| 8. Drug preparation and administration characteristics including dose, route, formulation, infusion duration (if applicable) and frequency are described. | Partially | Yes | Yes | Yes | Yes | Yes | Partially |
| 9. Body fluid or tissue sampling (timing, frequency and storage) for quantitative drug measurement is described. | Yes | Yes | Yes | Yes | Yes | Yes | No |
| 10. Validation of quantitative bioanalytical methods used in the study are referenced or described if applicable. | Yes | Yes | Yes | Yes | Yes | Yes | Yes |
| 11. Pharmacokinetic modeling methods and software used are described, including assumptions made regarding the number of compartments and order of kinetics (zero, first or mixed order). | Yes | Yes | Yes | Yes | Yes | Yes | Yes |
| 12. For population pharmacokinetic studies, covariates incorporated into pharmacokinetic models are identified and described. | NA | NA | NA | NA | Yes | Yes | Yes |
| 13. Formulas for calculated variables (such as creatinine clearance, body surface area, AUC, and adjusted body weight) are provided or referenced. | Yes | Yes | Yes | Yes | Yes | Yes | Yes |
| 14. The specific body weight used in drug dosing and pharmacokinetic calculations are reported (i.e., ideal body weight vs. actual body weight vs. adjusted body weight) | No | Yes | Yes | Yes | Yes | Yes | Yes |
| 15. Statistical methods including software used are described | NA | NA | Yes | Yes | Yes | Yes | Yes |
| **Results** | | | | | | | |
| 16. Study withdrawals or subjects lost to follow- up (or lack thereof) are reported. | Yes | No | Yes | Yes | Yes | Yes | Yes |
| 17. Quantification of missing or excluded data is provided if applicable. | Yes | No | Yes | Yes | Yes | Yes | Yes |
| 18. All relevant variables that may explain inter- and intra-patient pharmacokinetic variability (including: age, sex, end-organ function, ethnicity, weight or BMI, health status or severity of illness, and pertinent co-morbidities) are provided with appropriate measures of variance. | Yes | No | Yes | Yes | Yes | Yes | Yes |
| 19. Results of pharmacokinetic analyses are reported with appropriate measures of precision (such as range or 95% confidence intervals) | Yes | Yes | Yes | Yes | Yes | Yes | Yes |
| 20. Studies in patients receiving extracorporeal drug removal (i.e., dialysis) should report the mode of drug removal, type of filters used, duration of therapy and relevant flow rates. | NA | NA | NA | NA | NA | NA | NA |
| 21. In studies of drug bioavailability comparing two formulations of the same drug, F (bioavailability), AUC, Cmax (maximal concentration) and Tmax (time to maximal concentration) should be reported. | NA | NA | NA | NA | NA | NA | NA |
| **Discussion/Conclusion** | | | | | | | |
| 22. Study limitations describing potential sources of bias and imprecision where relevant should be described | Yes | No | No | No | No | Yes | Yes |
| 23. The relevance of study findings (applicability, external validity) is described | Yes | No | No | Yes | Yes | Yes | Yes |
| **Other Information** | | | | | | | |
| 24. Funding sources and conflicts of interest for the authors are disclosed. | No | No | No | No | No | Yes | No |

NA, not applicable
